# Supplementary material for: Nanoscale characterization of the sequestration and transformation of silver and arsenic in soil organic matter using atom probe tomography and transmission electron microscopy
Source: Royal Society of Chemistry journal article supplement (doi:10.1039/d2em00332e), 2023-01-01
Supplement: d2em00332e1.pdf [file d2em00332e1.pdf]

## Supplementary data

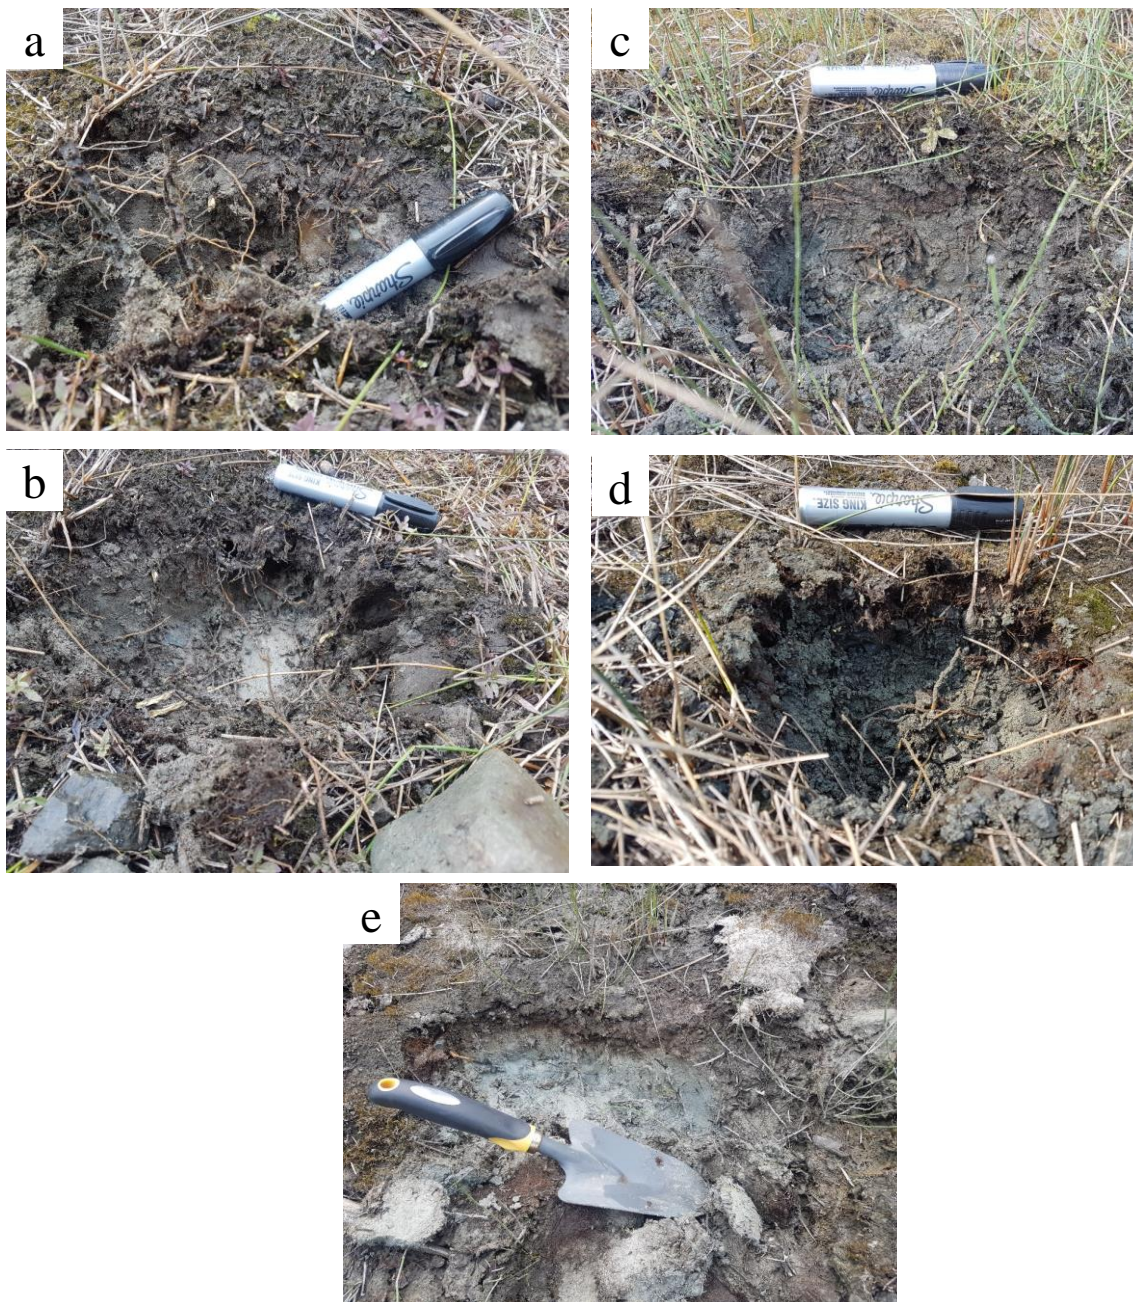

Figure S1: Photos of the samples and sample locations a) 1s, b) 2s and 2u, c) 3s and 3u, d) 4s and 4u, e) 5s and 5u

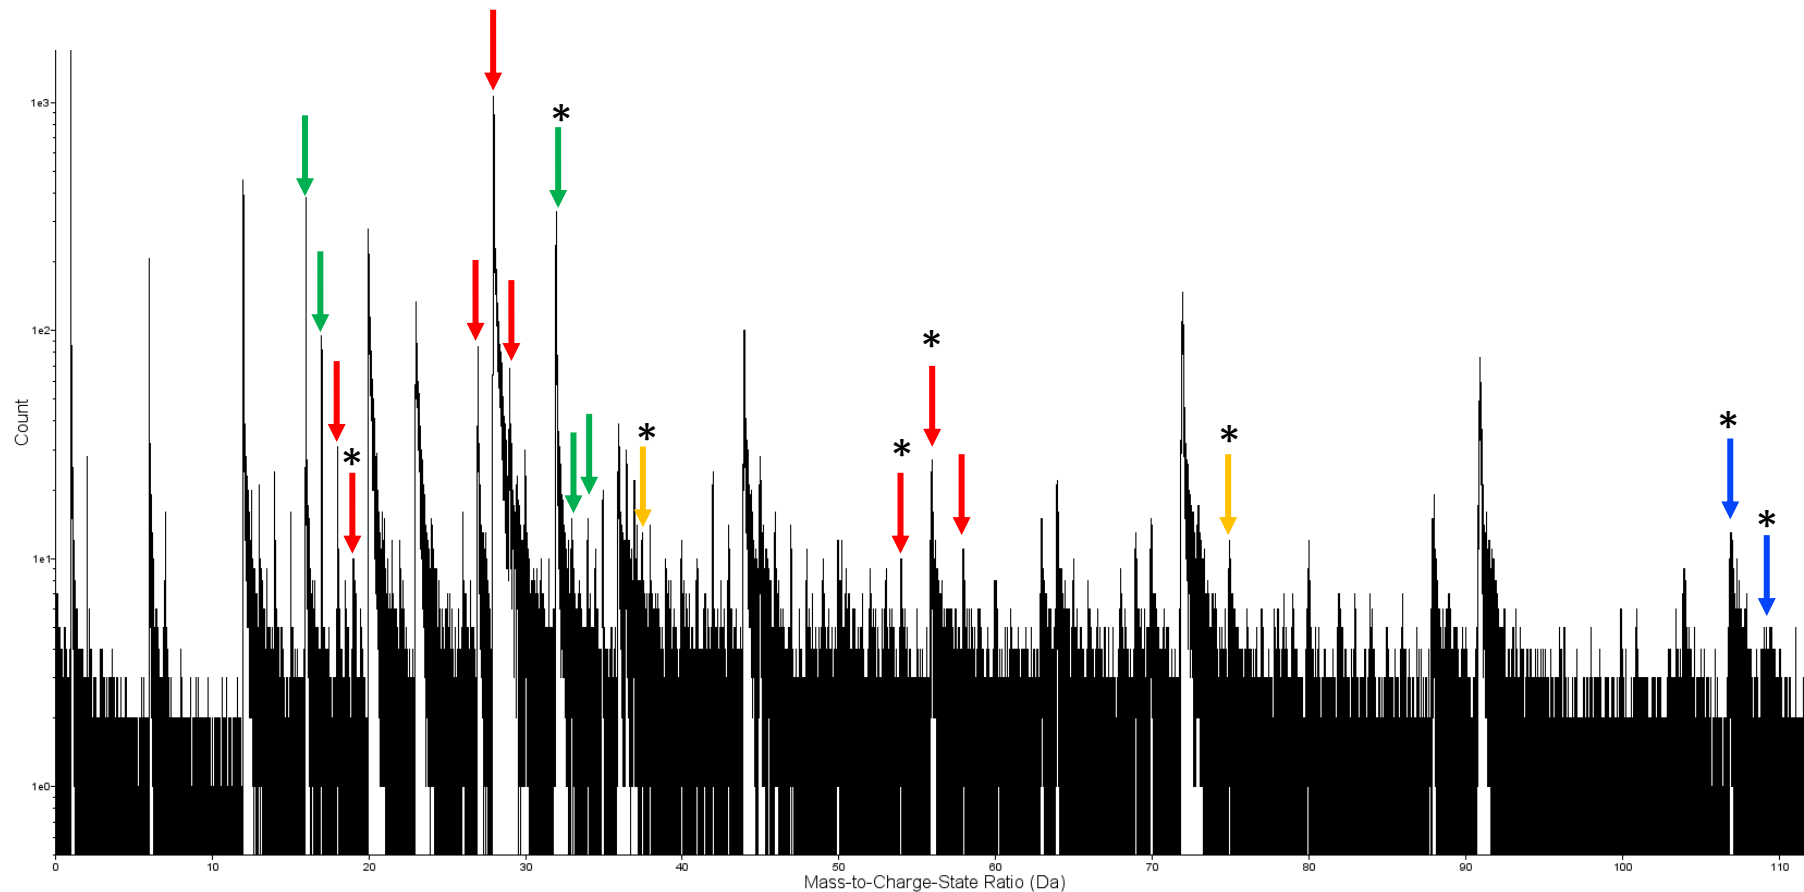

Figure S2: The mass spectrum of an APT-FIB section. The peaks for Fe, S, As, and Ag are indicated with red, green, orange, and blue color arrows, respectively. Peaks corresponding to only one of the above-mentioned elements are labelled with stars.

Table S1: contact pH values of the collected samples

| Sample name | measurement with 0.01 mol L <sup>-1</sup><br>CaCl <sub>2</sub> solution | measurement with distilled water |
|-------------|-------------------------------------------------------------------------|----------------------------------|
| 1s          | 6.52                                                                    | 7.21                             |
| 2s          | 6.31                                                                    | 6.71                             |
| 3s          | 6.30                                                                    | 6.86                             |
| 4s          | 6.63                                                                    | 6.98                             |
| 5s          | 6.16                                                                    | 6.84                             |
| 2u          | 6.26                                                                    | 7.52                             |
| 3u          | 5.89                                                                    | 6.25                             |
| 4u          | 5.95                                                                    | 7.05                             |
| 5u          | 6.45                                                                    | 7.29                             |

Table S2: Concentrations of selected elements in the collected soil and tailings samples

| Sample | Ag<br>(mg kg <sup>-1</sup> ) | As<br>(mg kg <sup>-1</sup> ) | Co<br>(mg kg <sup>-1</sup> ) | S<br>(mg kg <sup>-1</sup> ) | Fe<br>(%) | Cu<br>(mg kg <sup>-1</sup> ) | Zn<br>(mg kg <sup>-1</sup> ) | Ni<br>(mg kg <sup>-1</sup> ) | Sulfide<br>(%) | Organic C<br>(%) |
|--------|------------------------------|------------------------------|------------------------------|-----------------------------|-----------|------------------------------|------------------------------|------------------------------|----------------|------------------|
| 1s     | 89.4                         | 944                          | 688                          | 1300                        | 3.73      | 236                          | 533                          | 237                          | 0.07           | 2.14             |
| 2s     | 129                          | 726                          | 437                          | 1000                        | 4.4       | 262                          | 349                          | 234                          | 0.03           | 2.3              |
| 3s     | 20.5                         | 3130                         | 1210                         | 3600                        | 3.59      | 266                          | 646                          | 484                          | 0.12           | 12.1             |
| 4s     | 124.7                        | 12243                        | 5240                         | 12600                       | 5.37      | 1695                         | 575                          | 9670                         | 0.32           | 5.19             |
| 5s     | 18.5                         | 2640                         | 5810                         | 5600                        | 1.8       | 205                          | 970                          | 3020                         | 0.14           | 12.4             |
| 2u     | 93.6                         | 414                          | 169                          | 400                         | 4.25      | 194                          | 132                          | 112                          | -              | -                |
| 3u     | 32.3                         | 376                          | 150                          | 900                         | 6.38      | 391                          | 199                          | 119                          | -              | -                |
| 4u     | 96.8                         | 3110                         | 1075                         | 1300                        | 6.02      | 524                          | 331                          | 801                          | -              | -                |
| 5u     | 57.2                         | 432                          | 452                          | 200                         | 4.35      | 71                           | 74                           | 237                          | -              | -                |

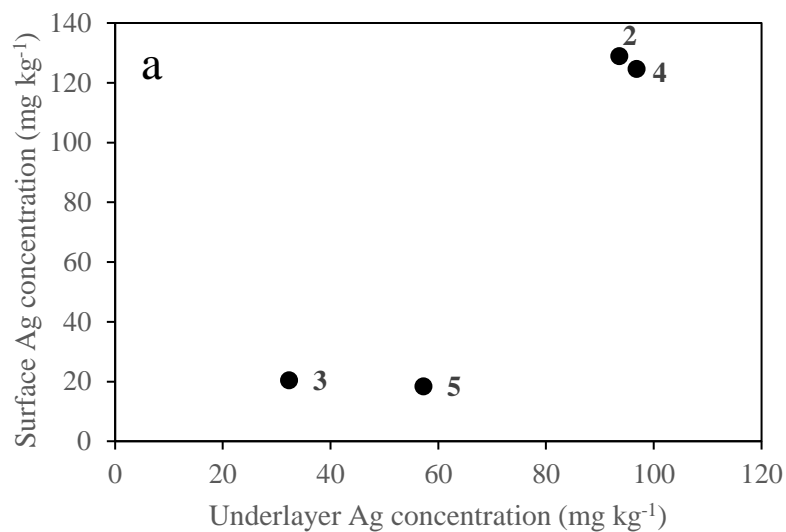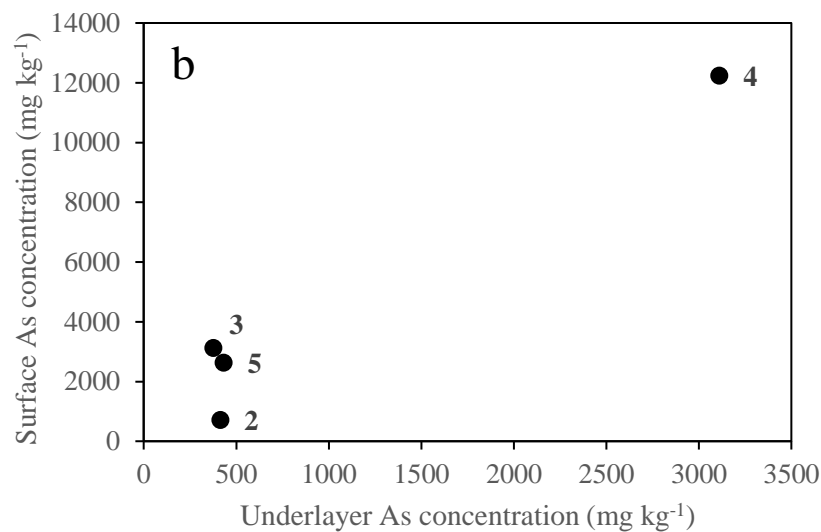

Figure S3: Plots of concentrations in the underlying tailings versus concentrations in organic-rich surficial soils: (a) Ag and (b) As.

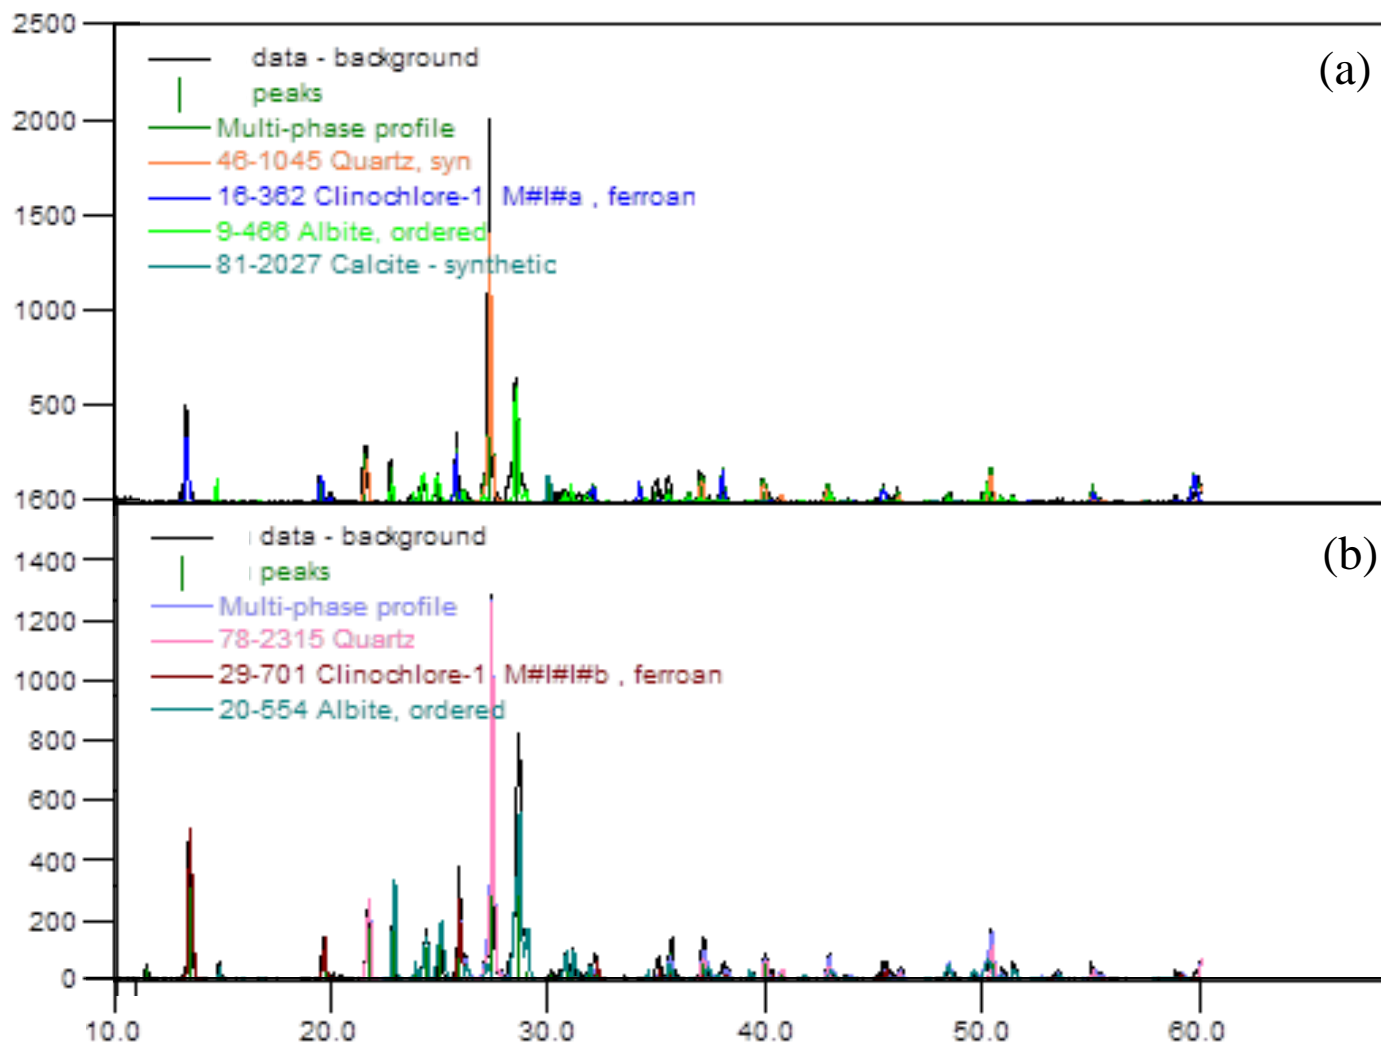

Figure S4: The XRD patterns of all collected samples were very similar, Here are shown the XRD patterns for the samples (a) 4s and (b) 4u



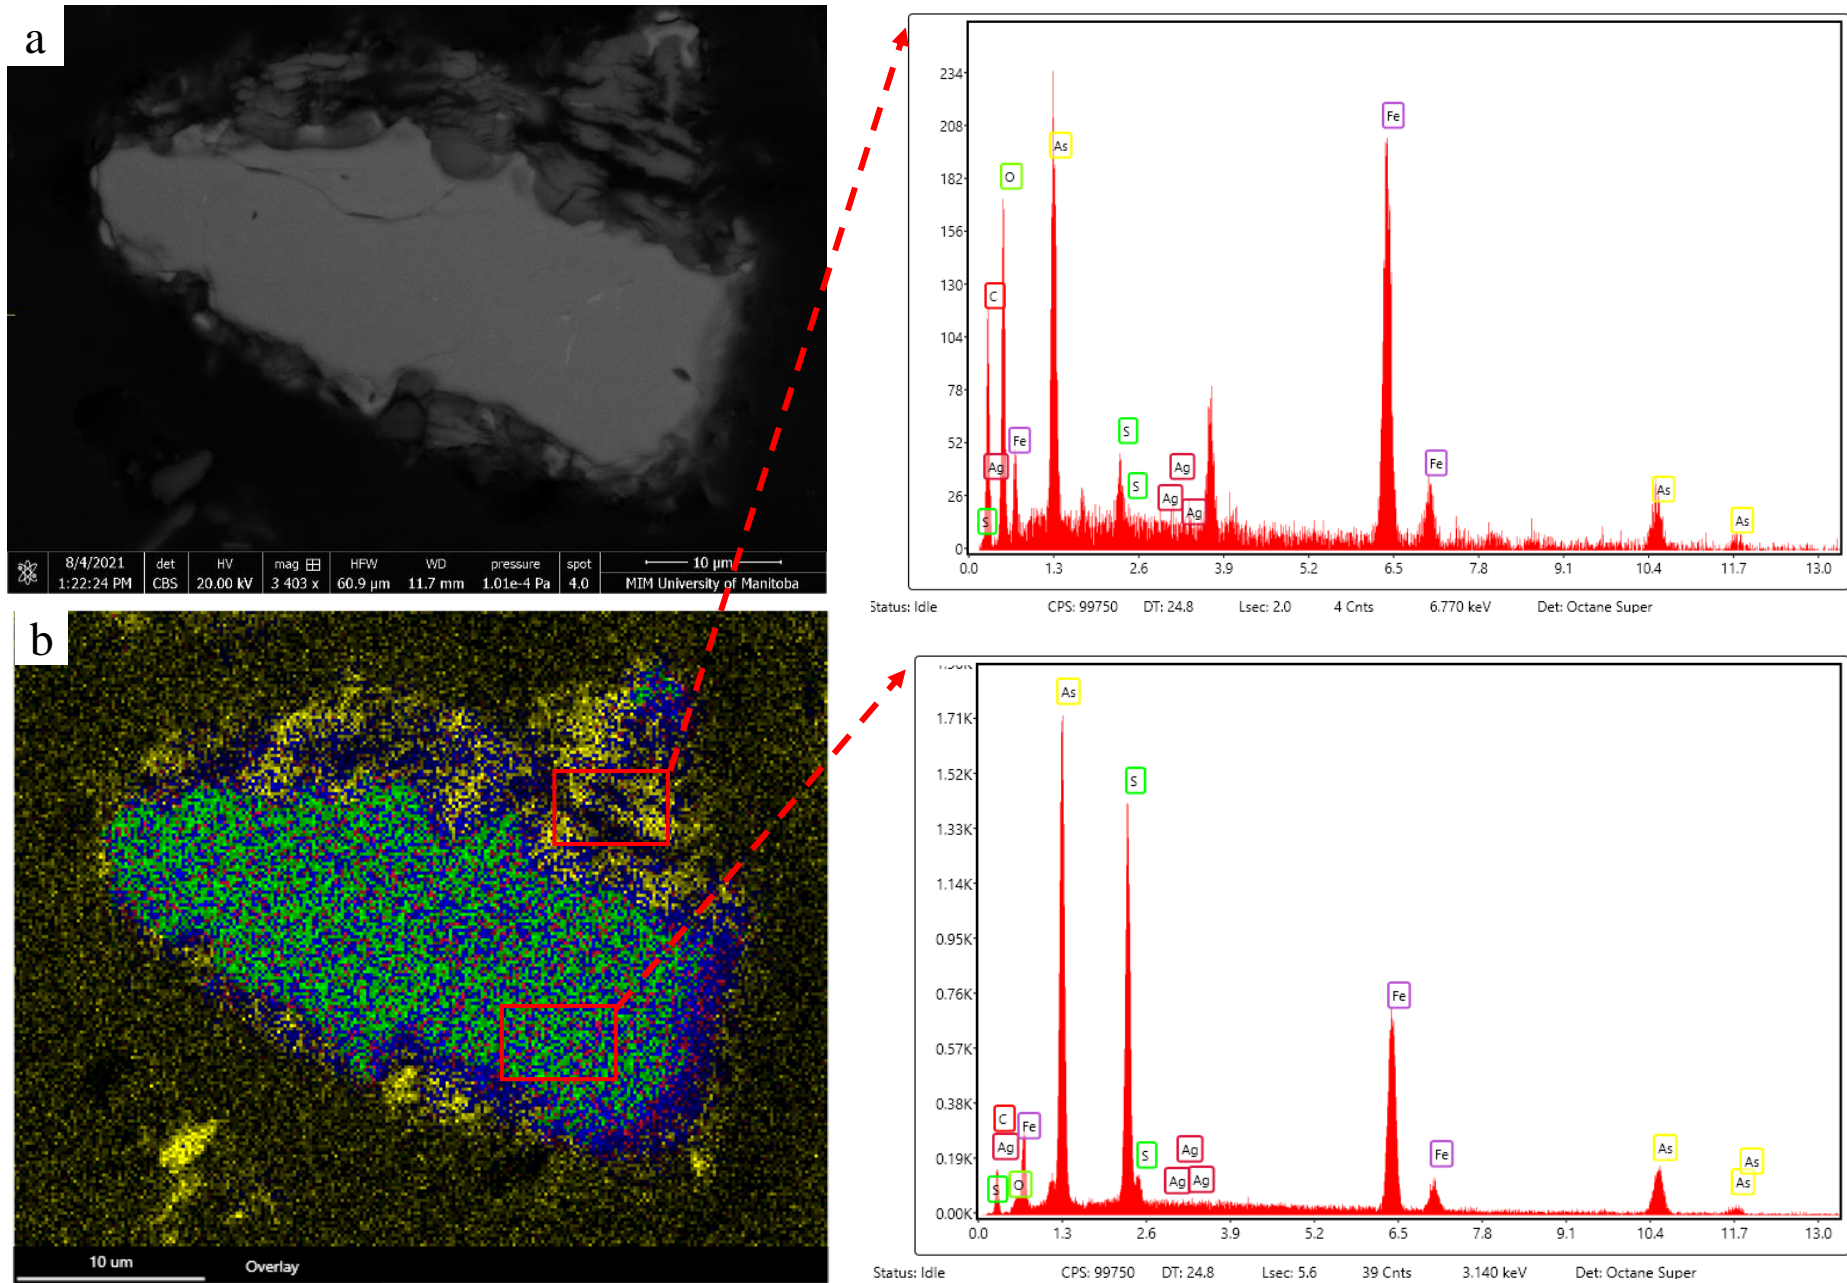

Figure S5: Arsenopyrite with scorodite-bearing mineral surface coating: (a) SEM image in BSE mode; (b) SEM-EDS chemical distribution map (S: green, Fe: blue, As: red, O: yellow) and EDS spectra for two selected locations



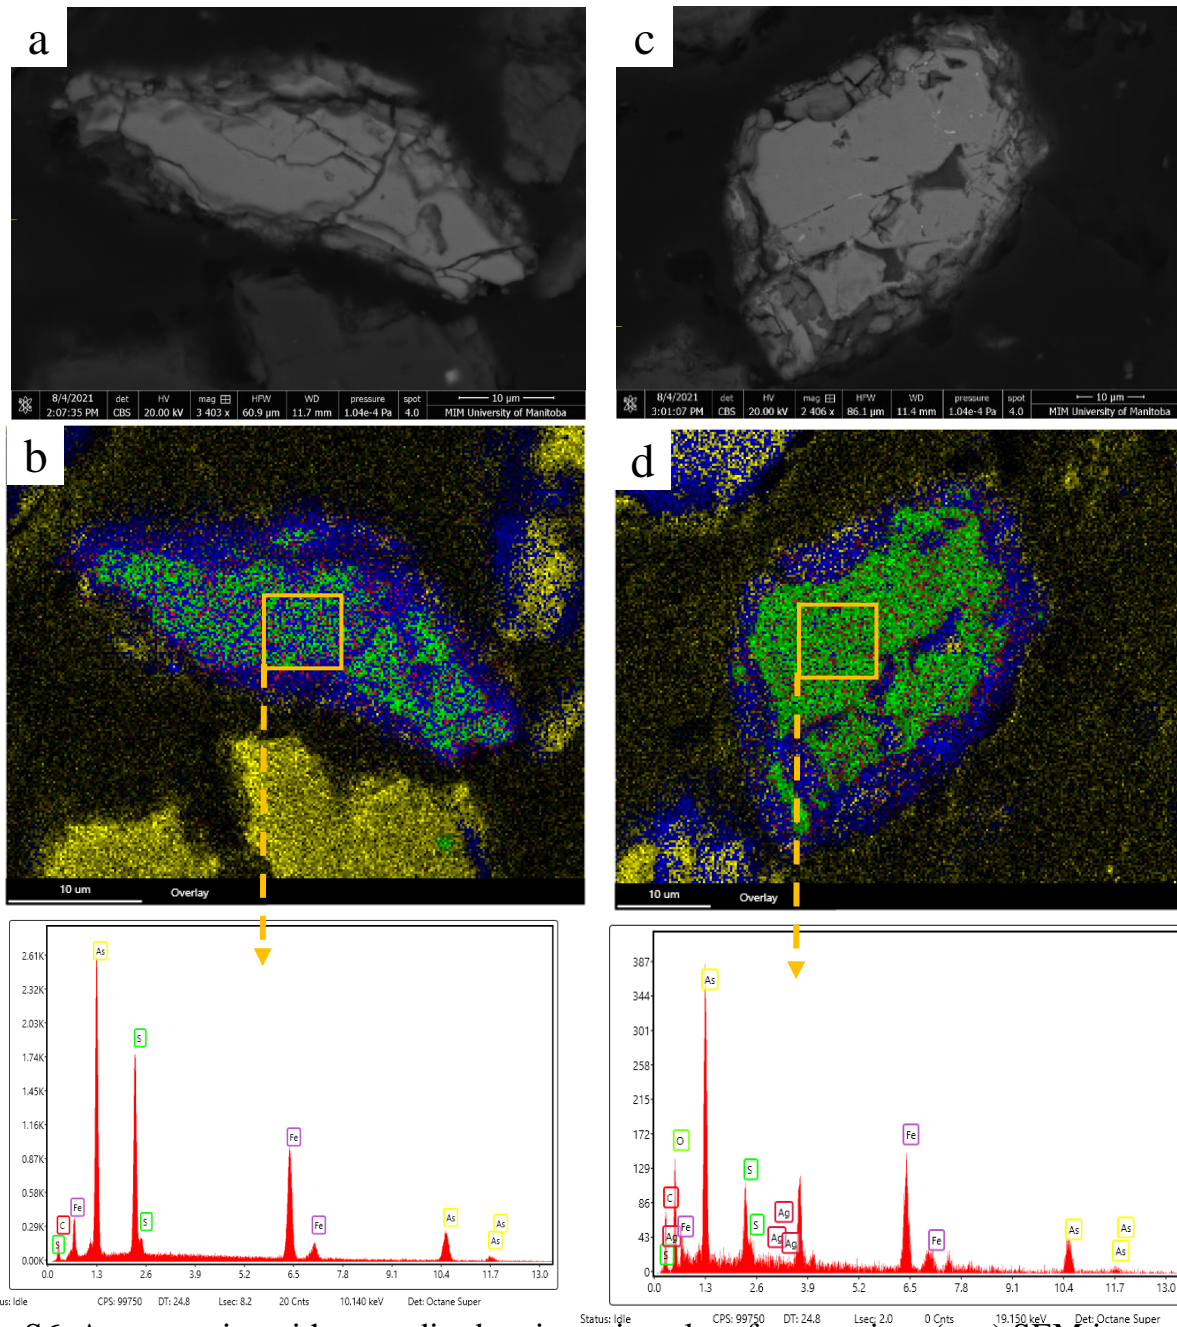

Figure S6: Arsenopyrite with scorodite-bearing mineral surface coating: (a, c) SEM images in BSE mode, (b, d) SEM-EDS chemical distribution maps (S: green, Fe: blue, As: red, O: yellow) and EDS spectra for two selected locations.

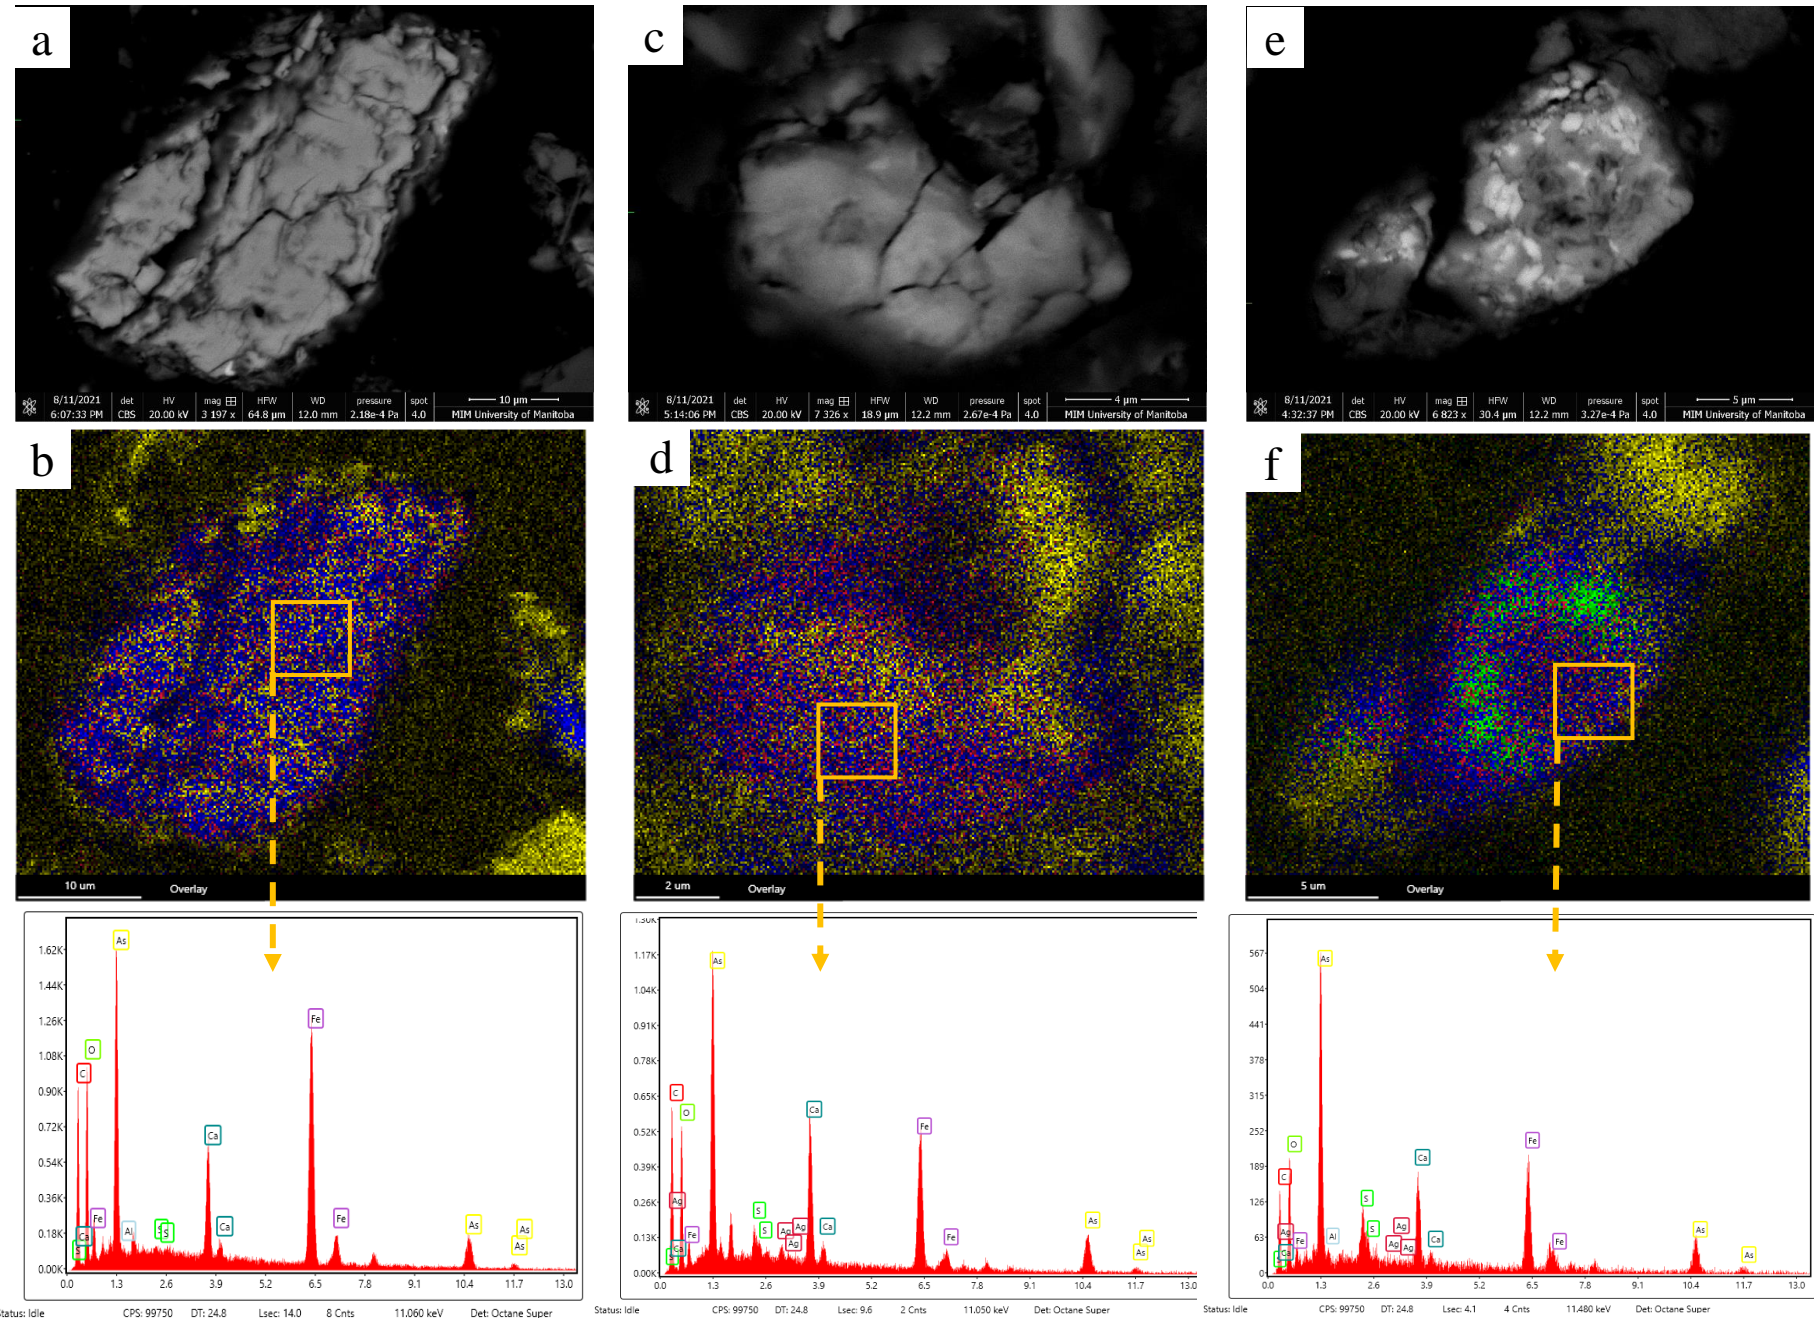

Figure S7: Scorodite-bearing mineral surface coatings on calcite: (a, c, e) SEM images in BSE mode and (b, d, f) SEM-EDS chemical maps with corresponding EDS spectra (S: green, Fe: blue, As: red, O: yellow)

(a)

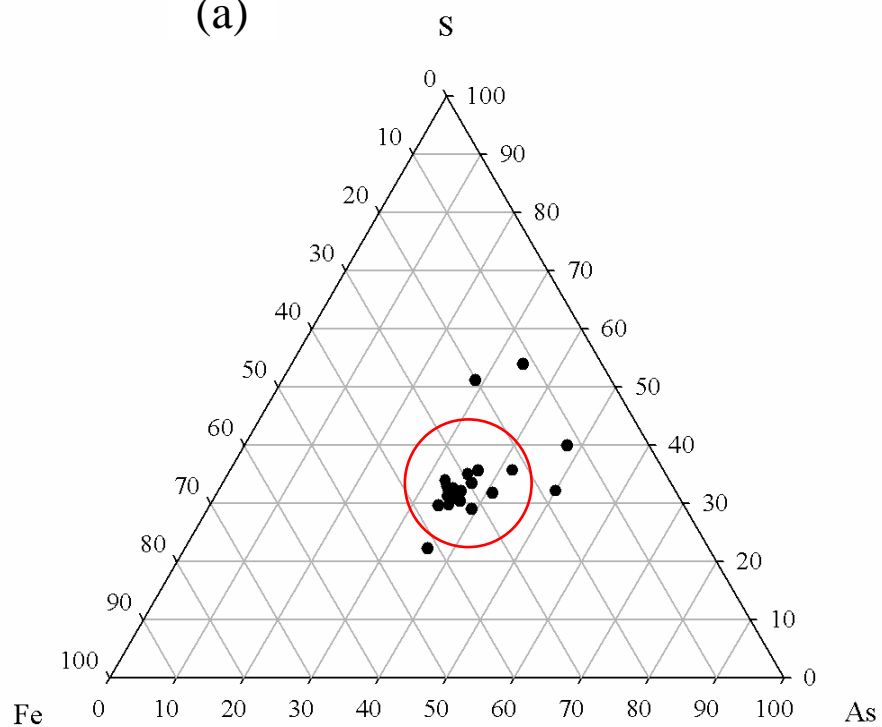

(b)

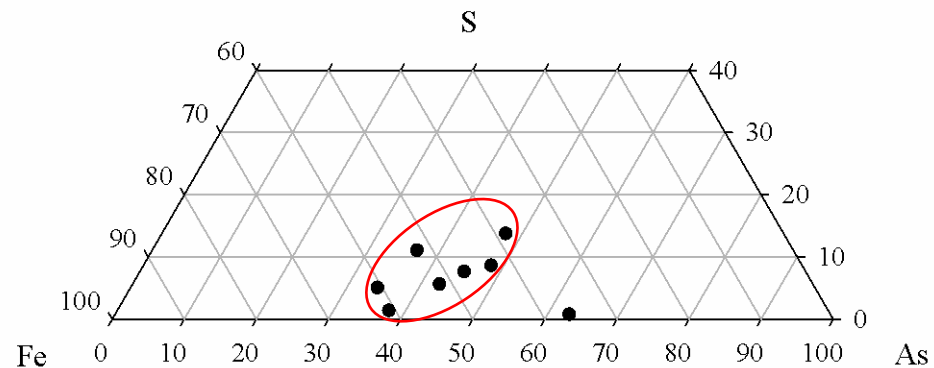

Figure S8: Triangle diagrams with Fe vs. As vs. S depicting the chemical composition of (a) sulfarsenides and (b) Sulfur-bearing arsenate

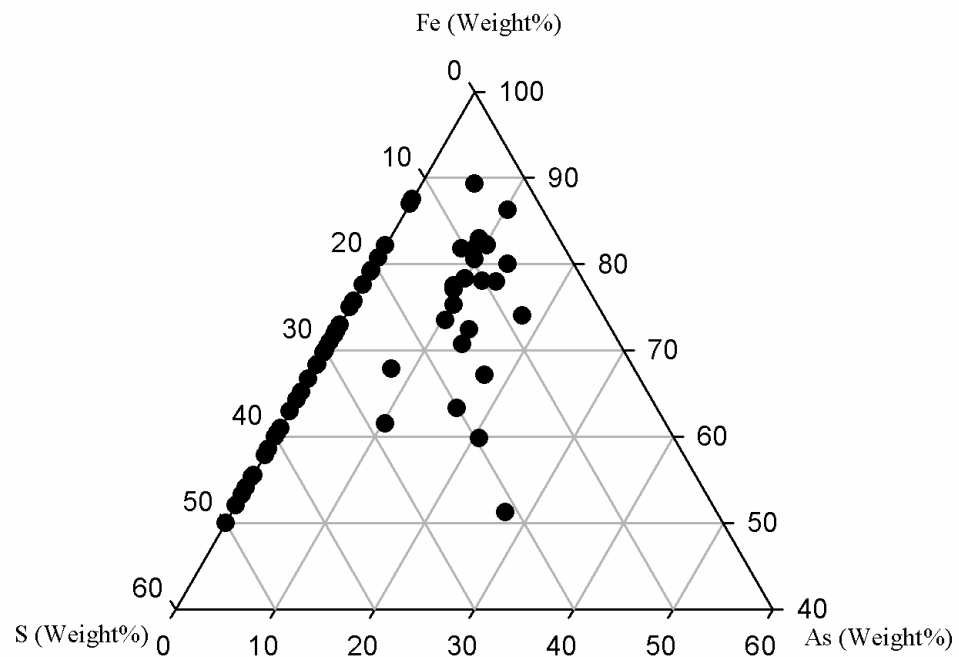

Figure S9: Triangle diagram depicting the Fe, S, and As content in 61 mineralized organic grains from four different sample locations



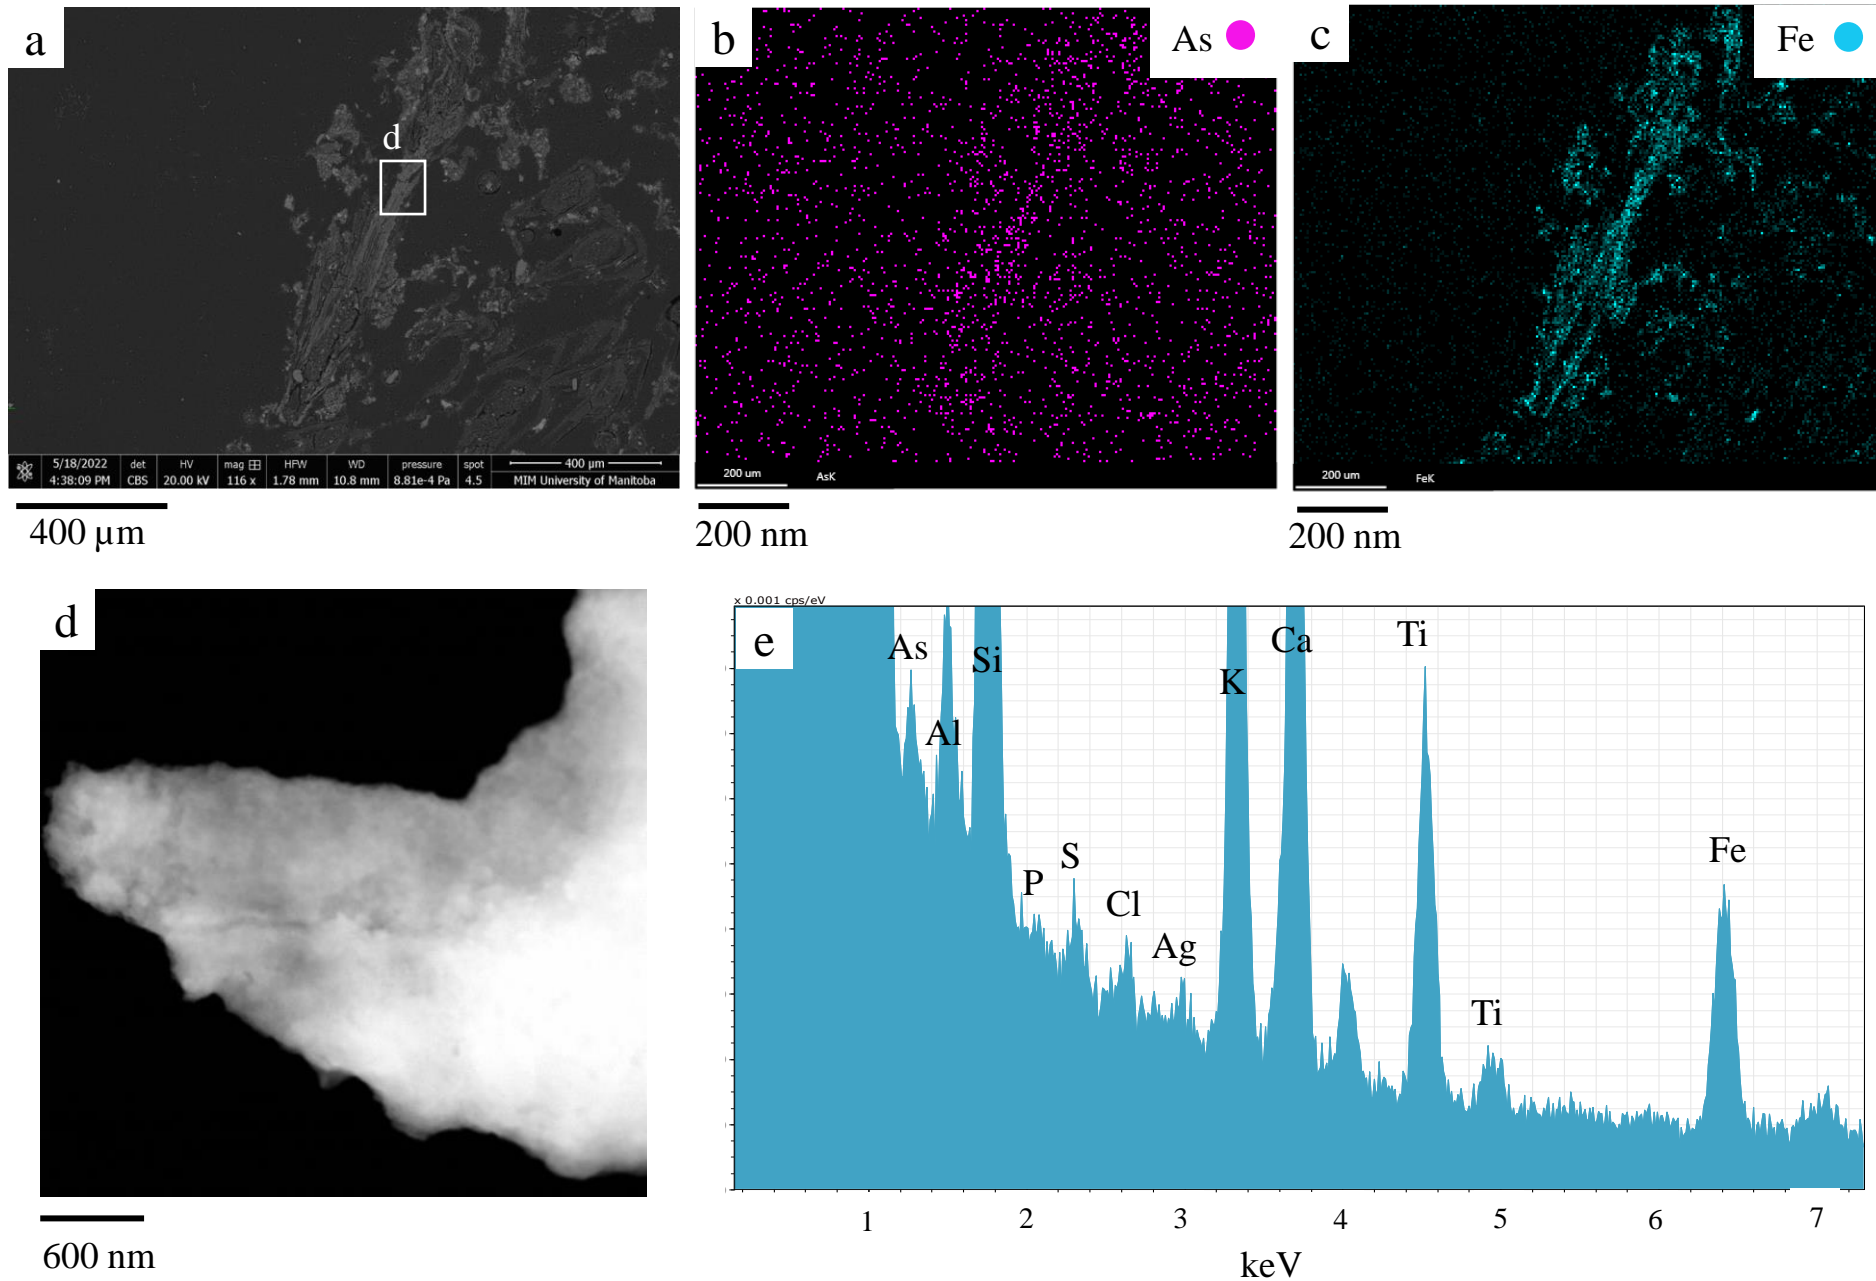

Figure S10: Images for TEM-mill 2: (a) SEM images in backscattering mode of an OM grain, the location of the extracted part for TEM analyses is shown as a rectangular; (b)-(c) SEM-EDS chemical distribution maps for (b) As (purple) and (c) Fe (blue) of the selected grains; (d) STEM image and (e) corresponding STEM-EDS spectrum for a selected area in the prepared TEM-mill1

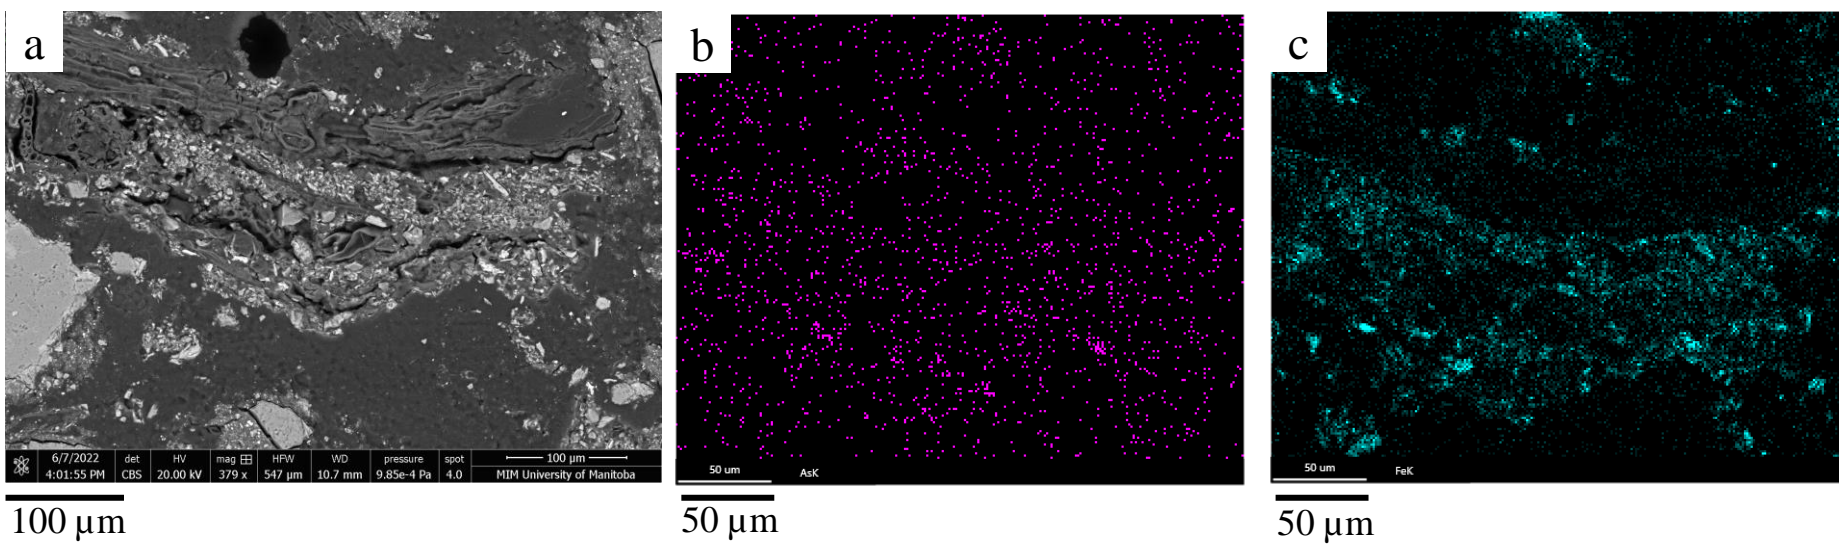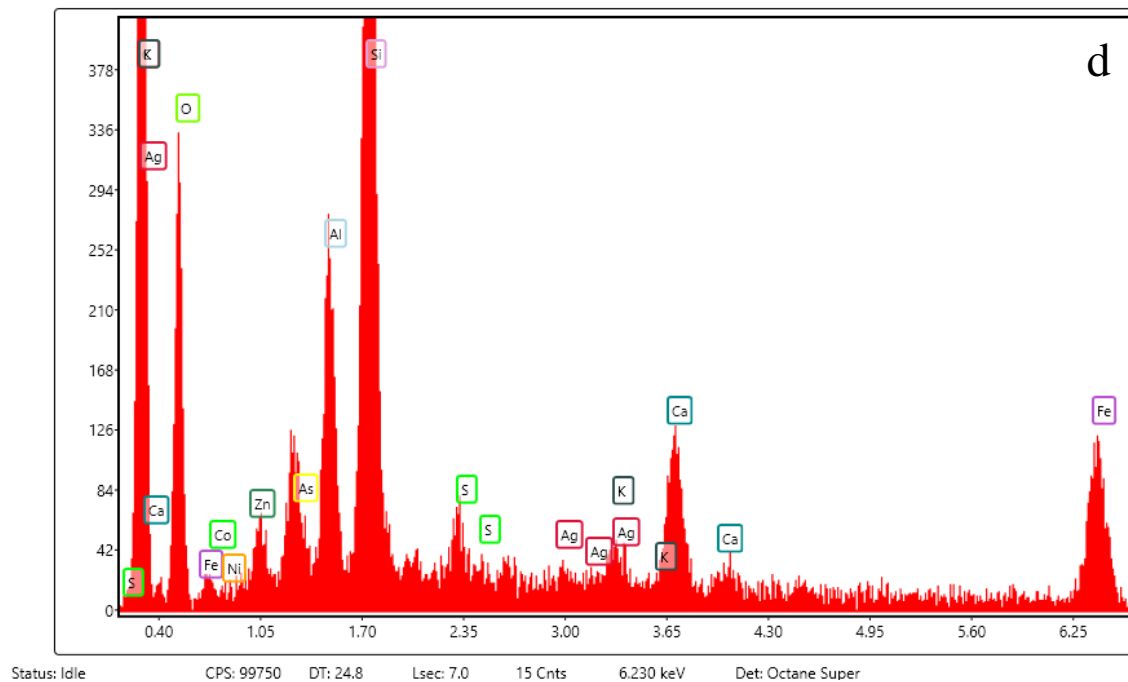

Figure S11: Images of an Ag-bearing OM grain: (a) SEM image in backscattering mode of an Ag-bearing OM grain; (b)-(c) SEM-EDS chemical distribution maps for (b) As (purple) and (c) Fe (blue) of the OM grain; (d) SEM-EDS spectrum of the entire OM grain.

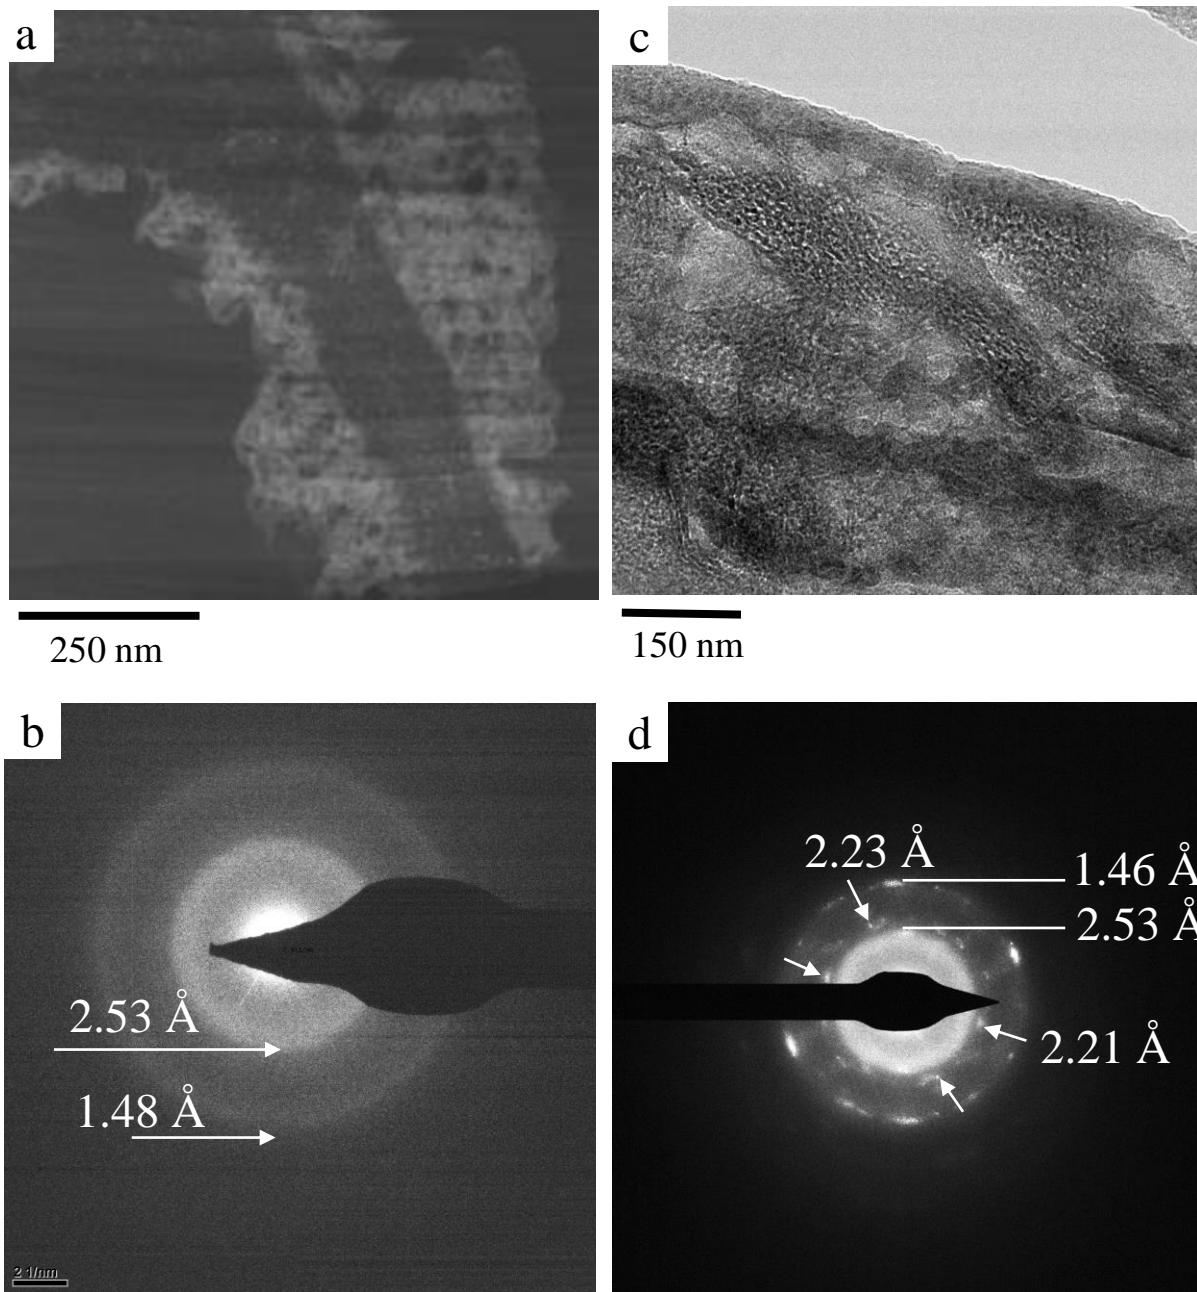

Figure S12: (a) STEM-EDS image of ferrihydrite with (b) corresponding diffraction pattern, (c) STEM-EDS image of hematite with (d) corresponding diffraction pattern,



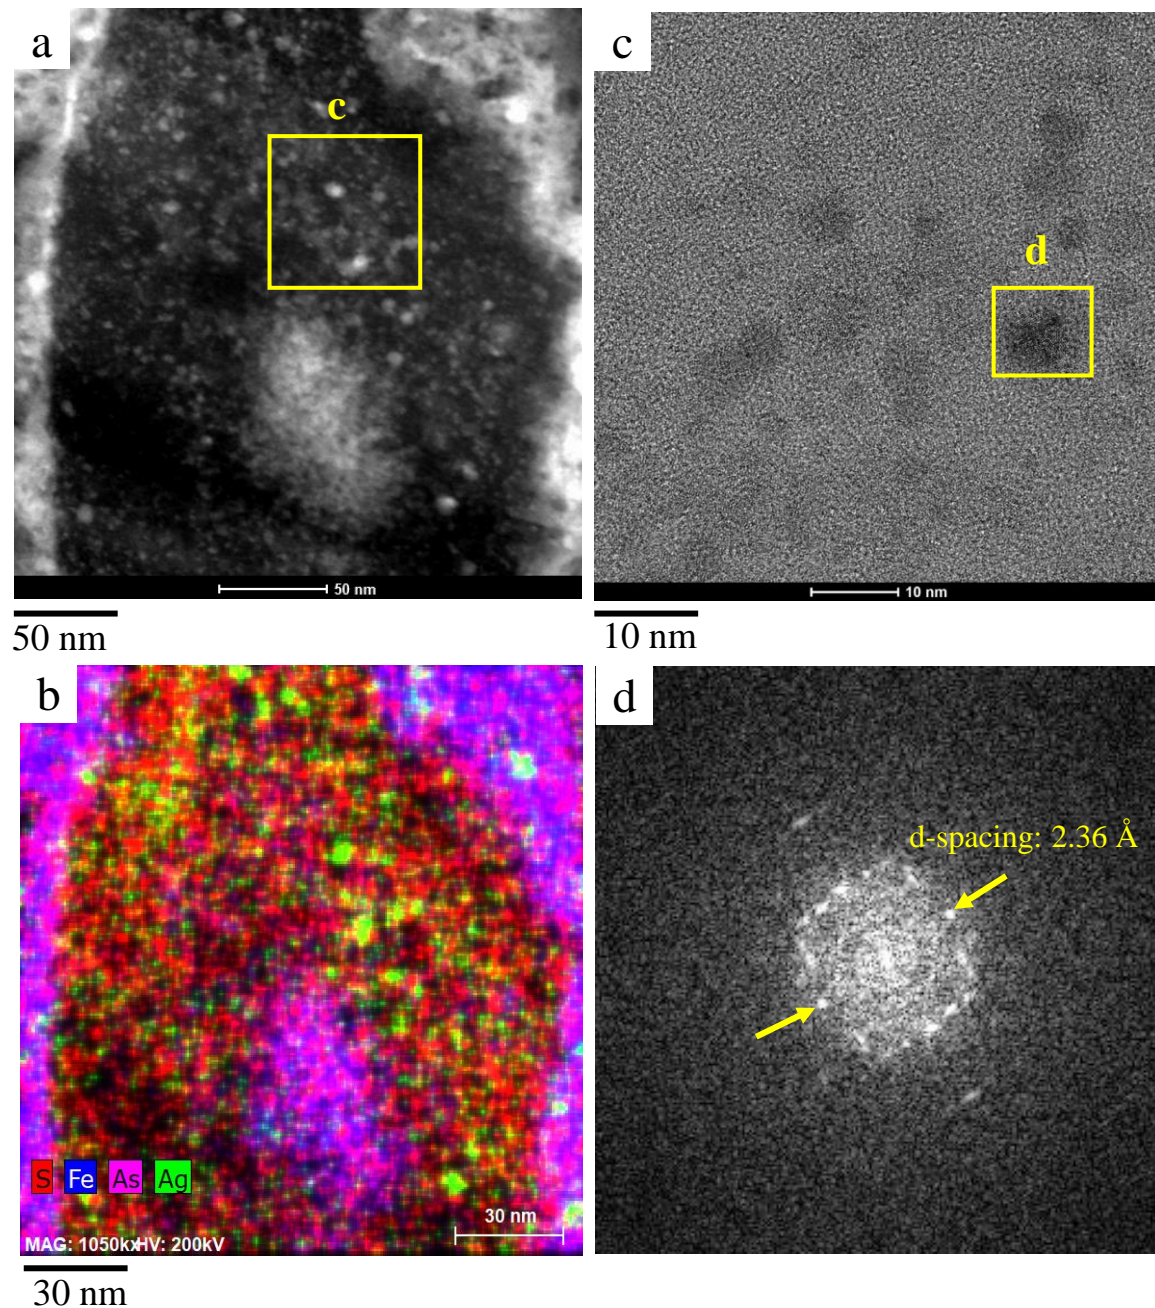

Figure S13: (a) STEM-EDS image and (b) STEM-EDS chemical distribution map (Fe: blue, As (violet), Ag (green)) of an area with Ag NPs; (c) HRTEM image of an assemblage of Ag NPs and (d) FFT pattern of a selected Ag NP (labelled in (c)).

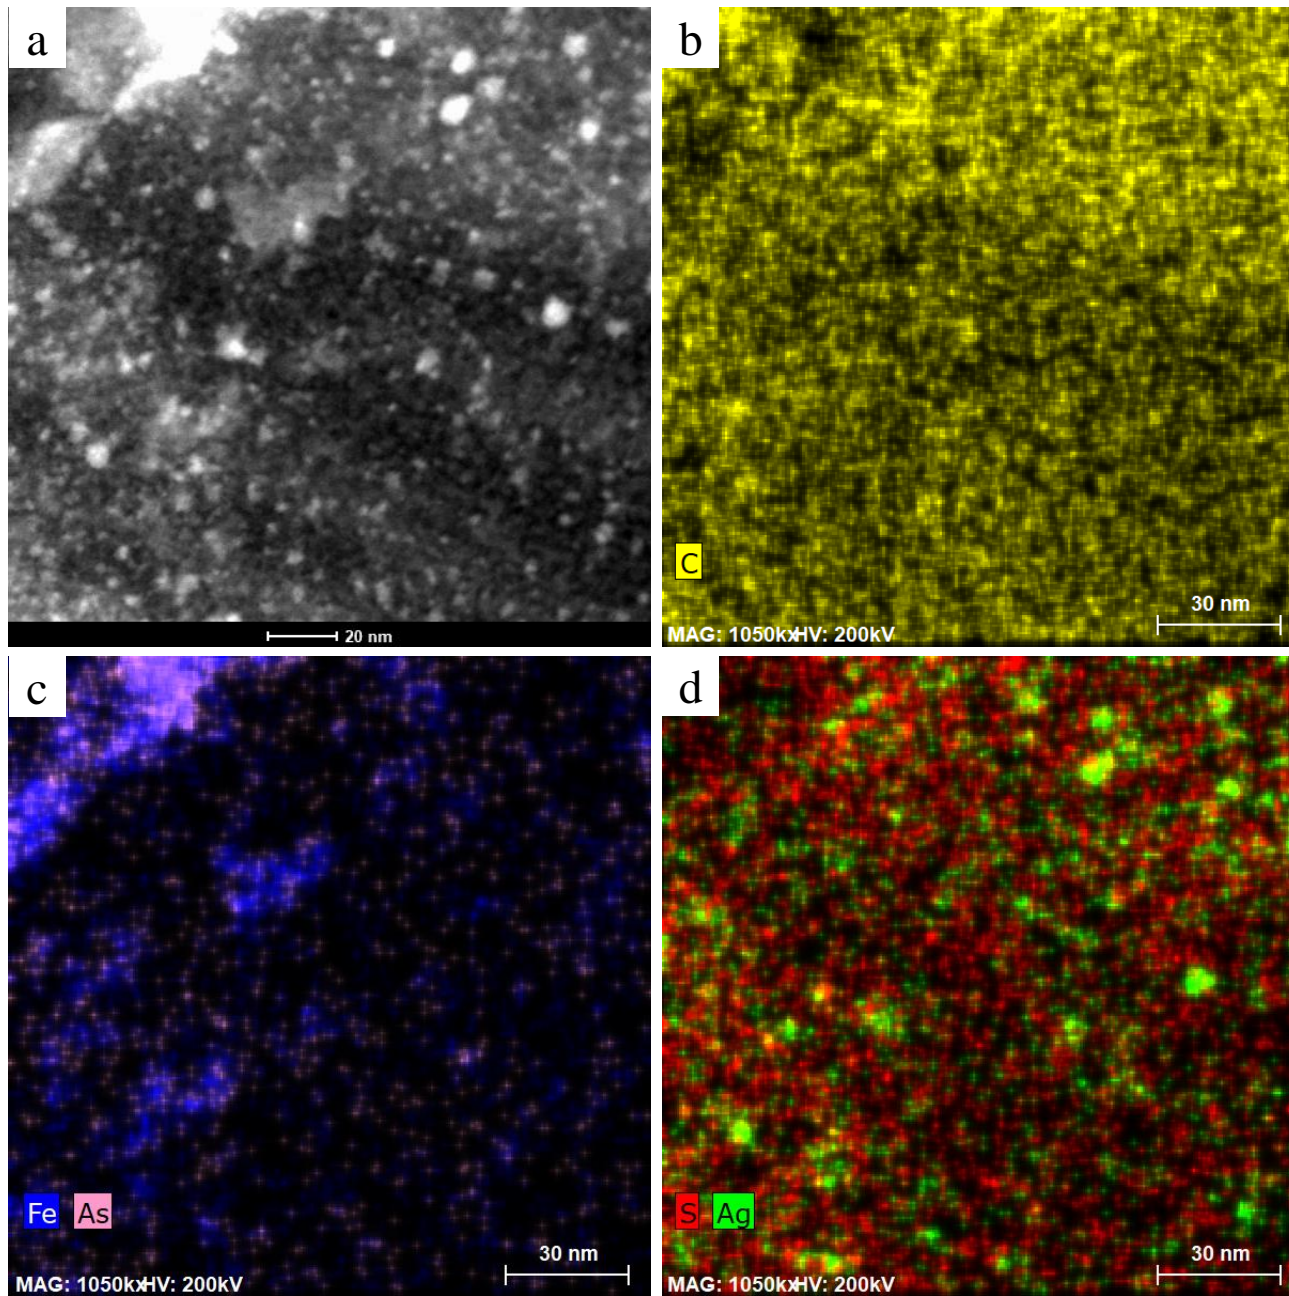

Figure S14: Occurrence of Ag and  $\text{Ag}_2\text{S}$  NP: (a) HRTEM image and (b)-(d) STEM-EDS chemical distribution map for (b) C, (c) Fe and S, and (d) S and Ag



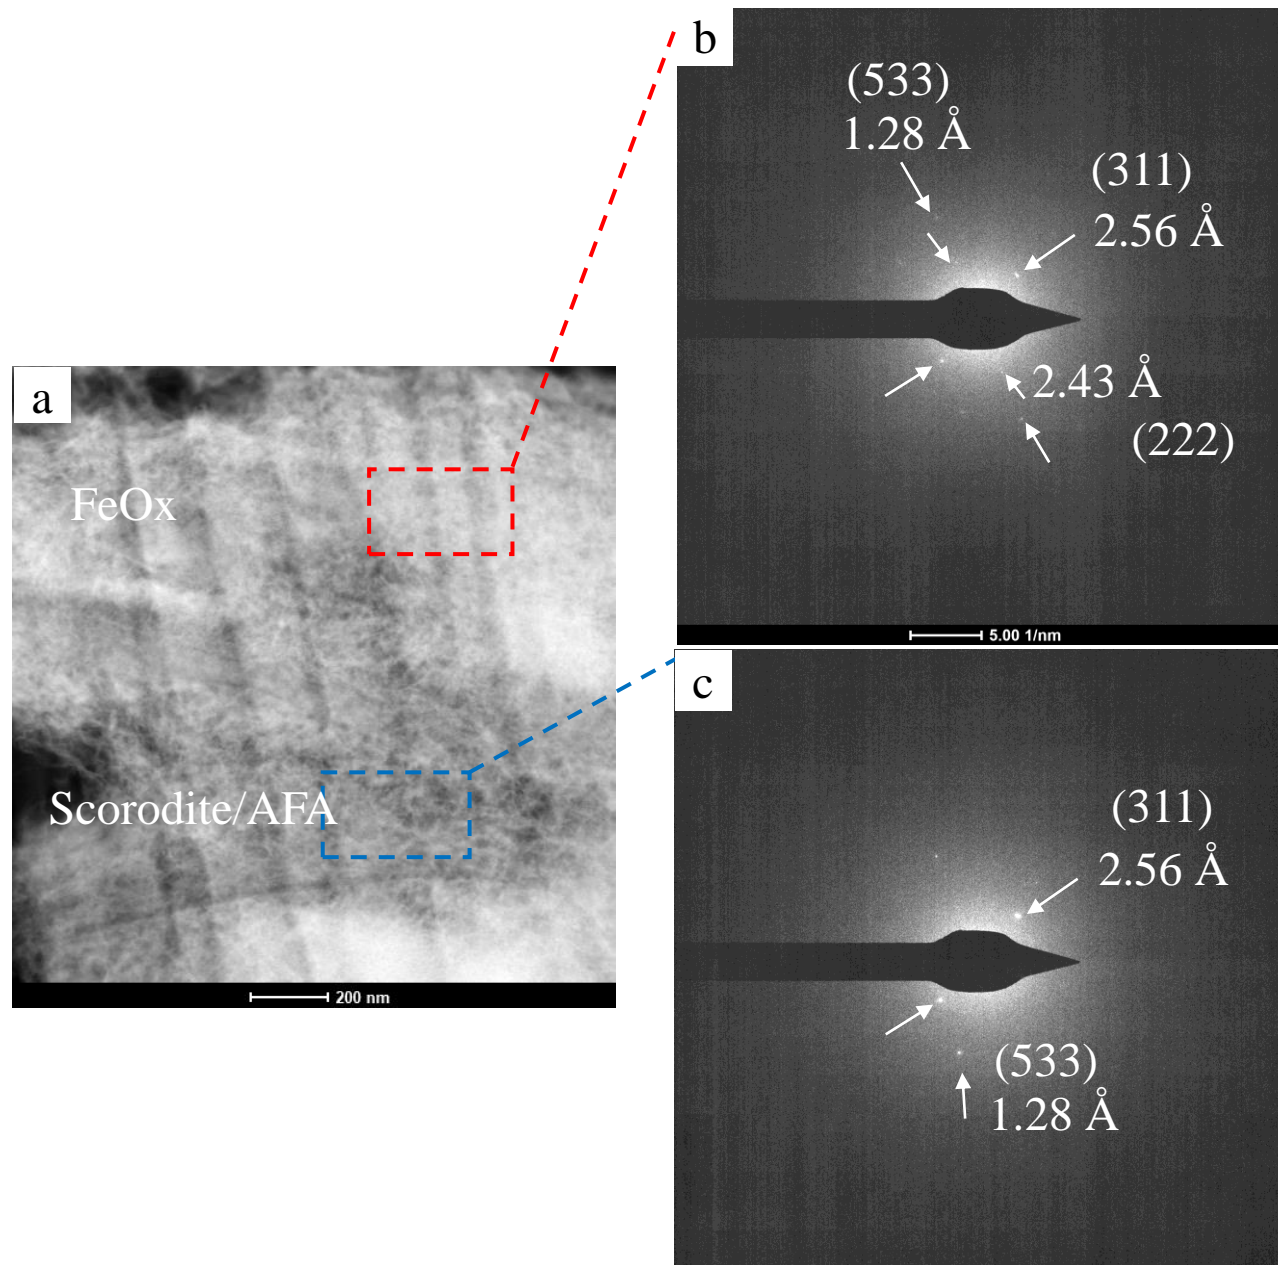

Figure S15: Unidentified Fe-(hydr)oxide (FeOx) - scorodite/AFA interface (a) HR-TEM image and (b)-(c) SAED pattern for scorodite/AFA

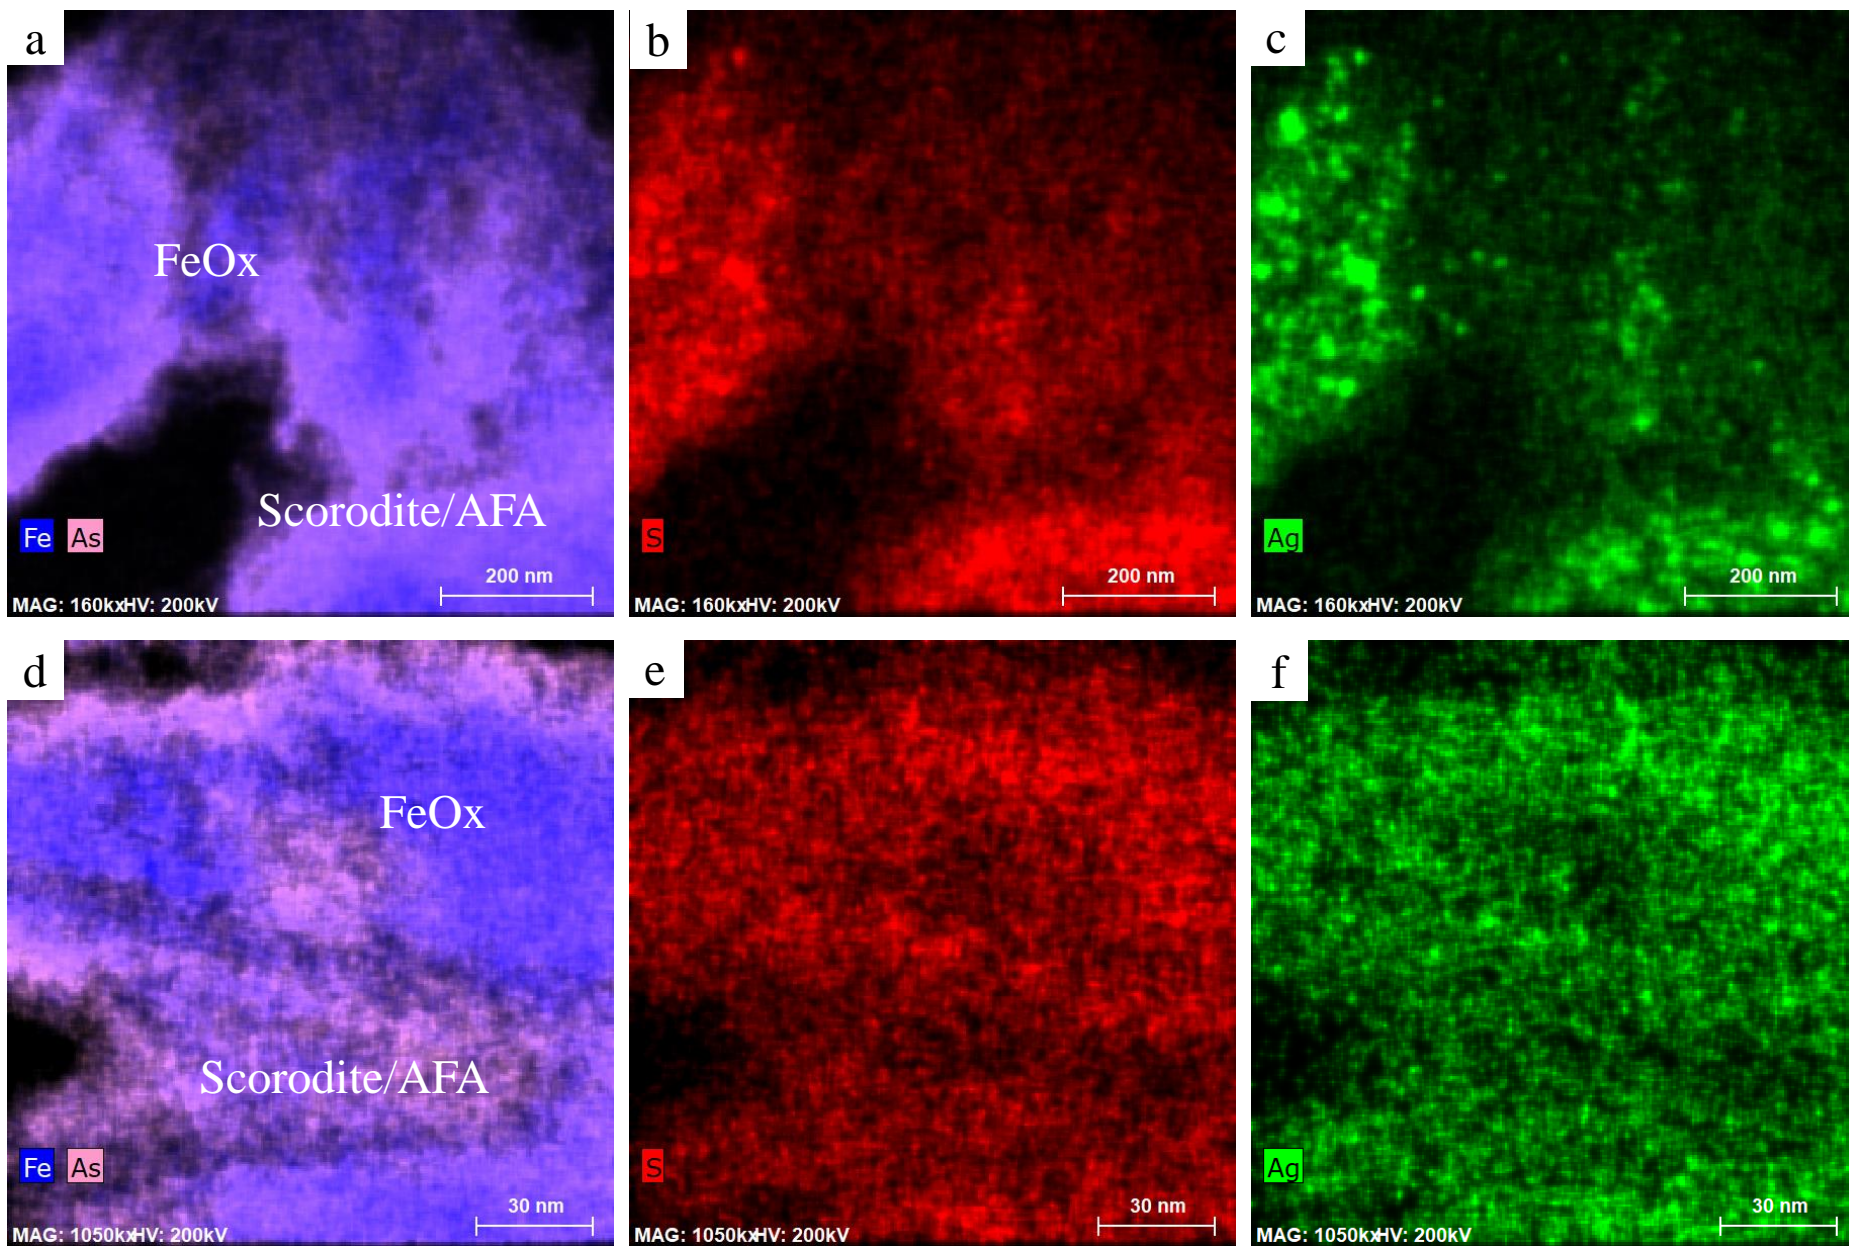

Figure S16: Unidentified Fe-(hydr)oxide (FeOx) and scorodite/AFA interface (a)-(f) STEM-EDS chemical distribution maps of Scorodite-bearing alteration layers on Fe-(hydr)oxides in TEM-FIB 2: (a)-(d) Fe and As; (b)-(e) S, (c)-(f) Ag;

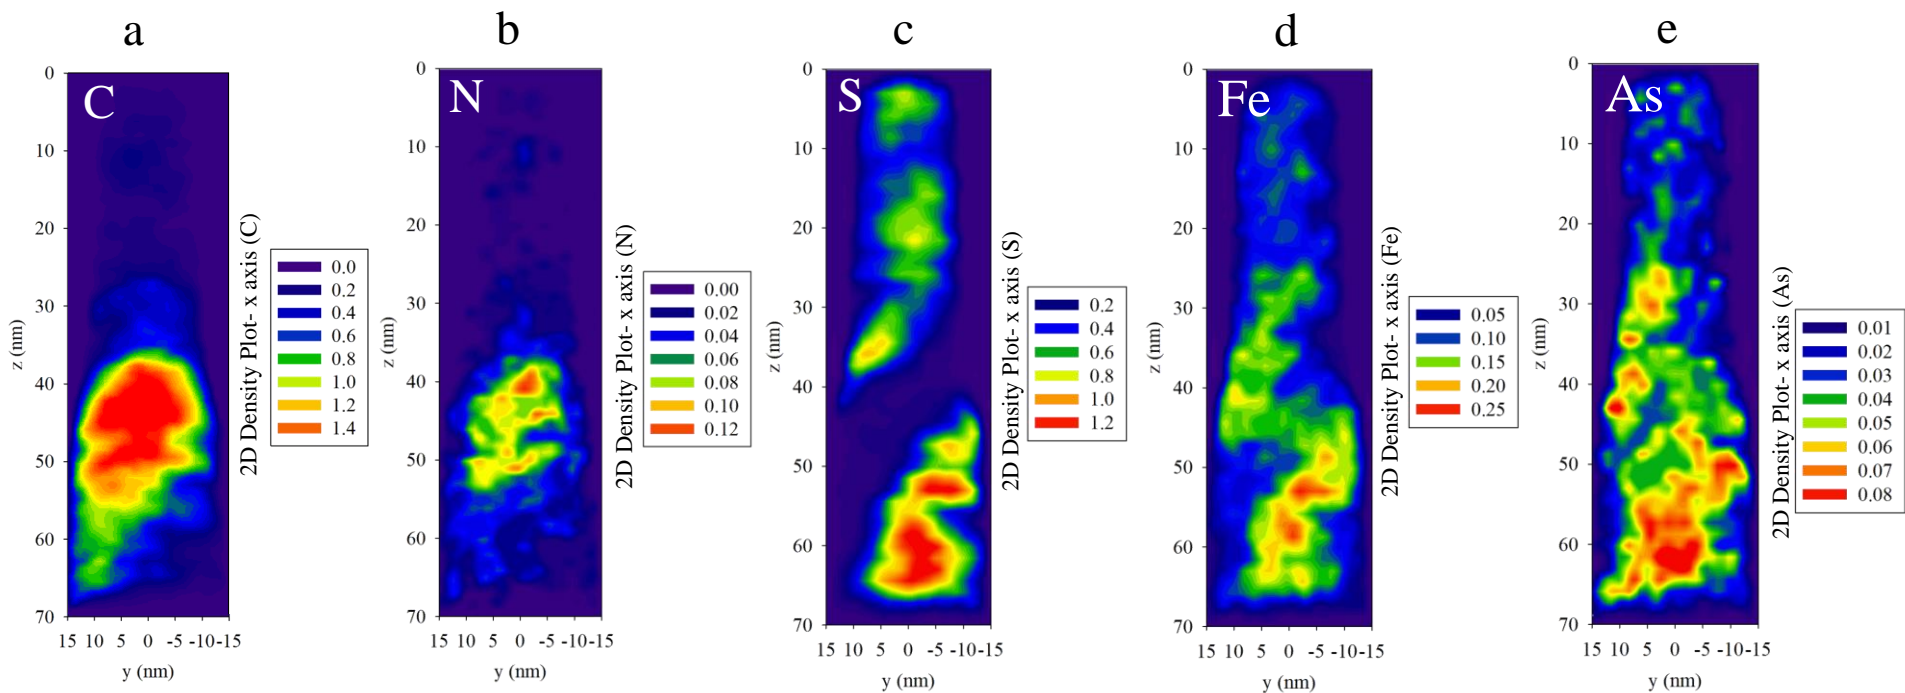

Figure S17: 2D heat maps for APT-FIB 1 (grain 1): (a) C, (b) N, (c) S, (d) Fe, (e) As
